# Supplementary material for: Flexible near-infrared organic photodetectors based on a high work function anode
Source: Royal Society of Chemistry journal article supplement (doi:10.1039/d4tc02709d), 2024-01-01
Supplement: d4tc02709d1.pdf [file d4tc02709d1.pdf]

## Electronic Supplementary Information

for

### Flexible Near-Infrared Organic Photodetectors Based on a High Work Function Anode

Jun Ma, <sup>†a</sup> Jiahui Wang, <sup>†bc</sup> Junli Hu <sup>\*a</sup> and Yichun Liu <sup>a</sup>

<sup>a</sup> Key Laboratory of UV-Emitting Materials and Technology, Northeast Normal University, Ministry of Education, Changchun 130024 (P. R. China)

<sup>b</sup> State Key Laboratory of Polymer Physics and Chemistry, Changchun Institute of Applied Chemistry, Chinese Academy of Sciences, Changchun 130022 (P. R. China)

<sup>c</sup> School of Applied Chemistry and Engineering, University of Science and Technology of China, Hefei 230026 (P. R. China)

\* Corresponding author. Email: [hujl100@nenu.edu.cn](mailto:hujl100@nenu.edu.cn).

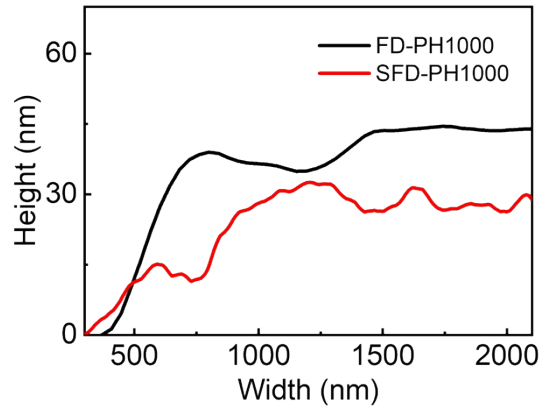

**Figure S1.** Thickness of FD-PH1000 and SFD-PH1000 films.

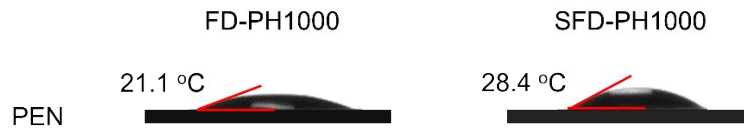

**Figure S2.** The contact angle of FD-PH1000 and SFD-PH1000 solution on the PEN substrate.

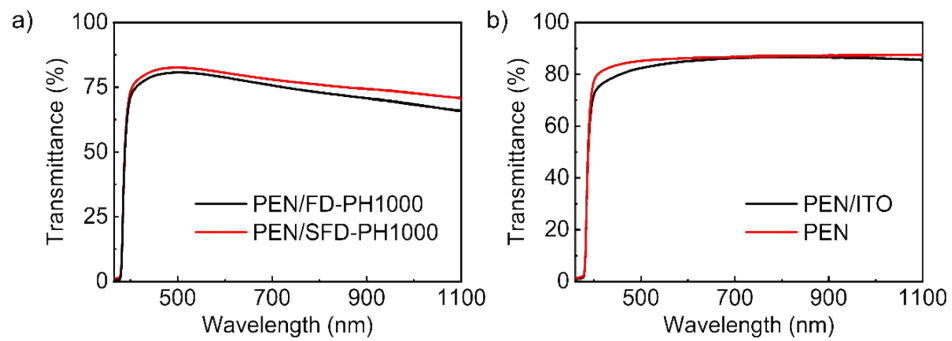

**Figure S3.** a) Transmission spectra of FD-PH1000 and SFD-PH1000 films on PEN substrate. b) Transmission spectra of PEN or PEN/ITO.

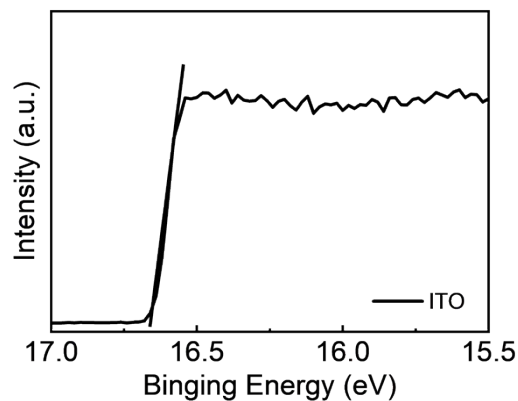

**Figure S4.** Secondary electron cutoff regions in UPS of ITO.

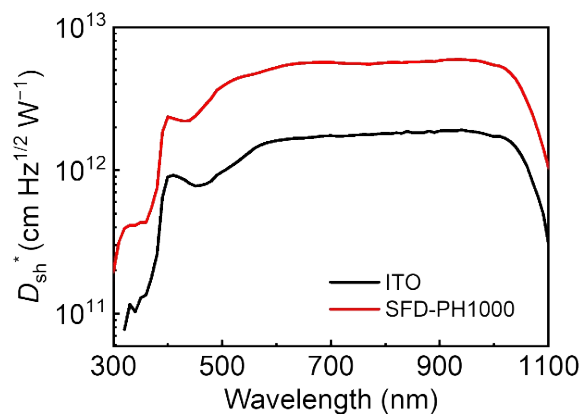

**Figure S5.**  $D_{sh}^*$  spectra under  $-0.1$  V applied voltage of the flexible OPD devices with different anodes.

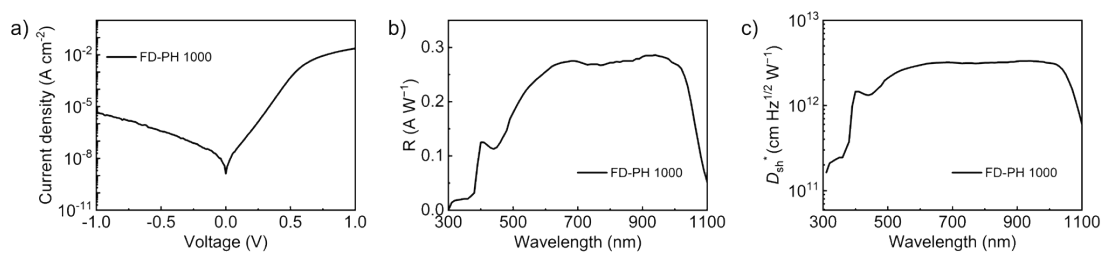

**Figure S6.** a)  $J$ - $V$  curves in the dark, b) responsivity of the devices at  $-0.1$  V. c)  $D_{sh}^*$  spectra under  $-0.1$  V applied voltage of the FD-PH1000-based OPD device.

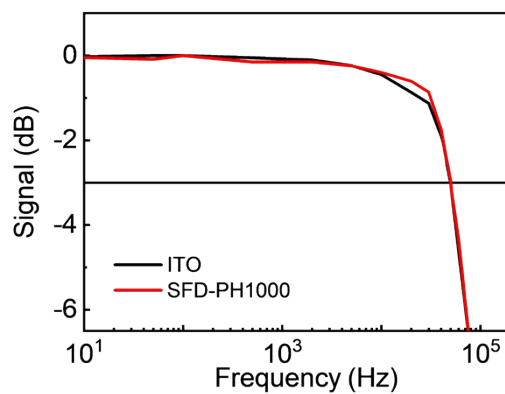

**Figure S7.** Normalized photo-response as a function of frequency.

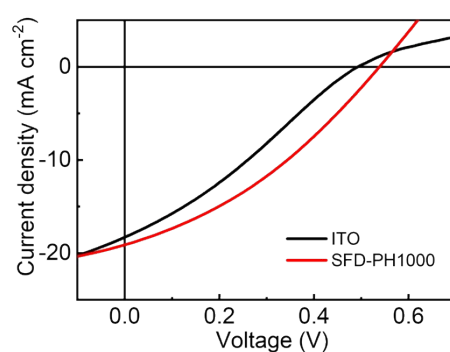

**Figure S8.**  $J$ - $V$  curves of the flexible OPD devices based on ITO and SFD-PH1000 anodes under AM 1.5G solar irradiation.

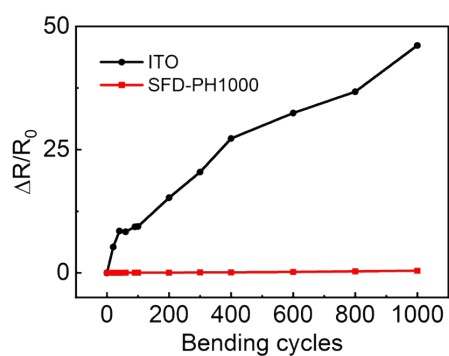

**Figure S9.** Sheet resistance variation ( $\Delta R/R_0$ ) of the ITO and SFD-PH1000 electrodes on PEN substrate as a function of bending cycles at bending radii of 5 mm.

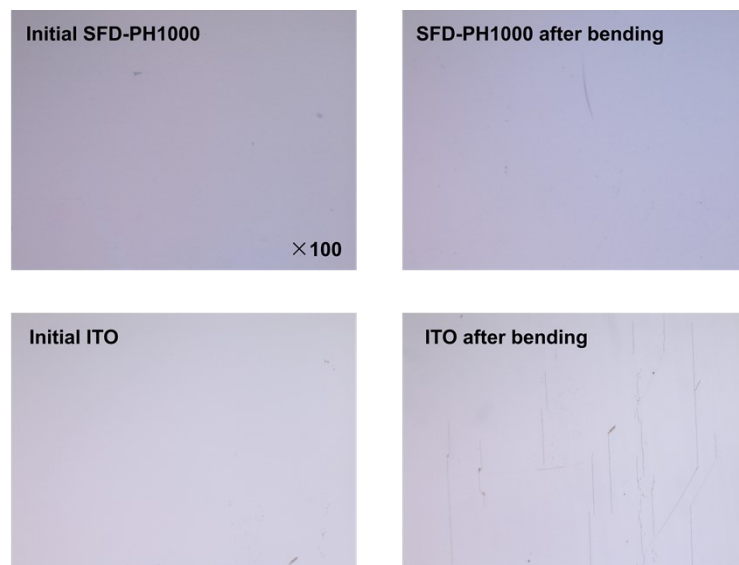

**Figure S10.** Optical microscope images of PEN/ITO and PEN/SFD-PH1000 before and after 1000 bending cycles.

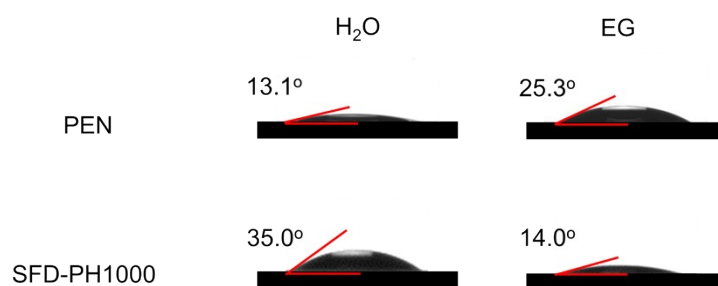

**Figure S11.** Contact angles of water and ethylene glycol on the PEN and SFD-PH1000.

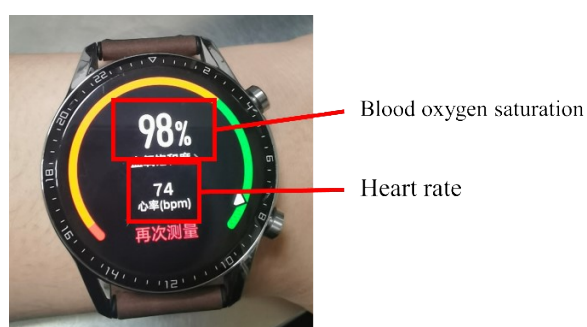

**Figure S12.** Heart rate and blood oxygen saturation by HUAWEI WATCH GT 2 Pro.

**Table S1.** Electrical Characteristics of different electrodes.

| Anode      | $R_{sq}$<br>( $\Omega/sq$ ) | d<br>(nm) | $\sigma$<br>(S/cm) | $T_{940\text{ nm}}$<br>(%) |
|------------|-----------------------------|-----------|--------------------|----------------------------|
| ITO        | 40                          | 50        | 5000               | 86.3                       |
| FD-PH1000  | 77                          | 44        | 2952               | 69.9                       |
| SFD-PH1000 | 71                          | 32        | 4400               | 73.7                       |

**Table S2.** Performance of OPD device with FD-PH1000 anodes at  $-0.1\text{ V}$ .

| Anode     | $J_d$<br>( $A\text{ cm}^{-2}$ ) | $R_{940\text{ nm}}$<br>( $A\text{ W}^{-1}$ ) | $D_{sh}^*$<br>( $cm\text{ Hz}^{1/2}\text{ W}^{-1}$ ) |
|-----------|---------------------------------|----------------------------------------------|------------------------------------------------------|
| FD-PH1000 | $2.30 \times 10^{-8}$           | 0.286                                        | $3.33 \times 10^{12}$                                |

**Table S3.** Surface energy of the substrate and electrodes as calculated from contact angle measurement results. The work of adhesion (W) between SFD-PH1000 electrode and the PEN substrate is calculated to be  $141.32\text{ mJ m}^{-2}$ .

| Materials  | $\theta_{H_2O}$<br>( $^\circ$ ) | $\theta_{EG}$<br>( $^\circ$ ) | $\gamma^d$<br>( $mJ\text{ m}^{-2}$ ) | $\gamma^p$<br>( $mJ\text{ m}^{-2}$ ) | $\gamma$<br>( $mJ\text{ m}^{-2}$ ) |
|------------|---------------------------------|-------------------------------|--------------------------------------|--------------------------------------|------------------------------------|
| PEN        | 13.1                            | 25.3                          | 0.52                                 | 91.91                                | 92.43                              |
| SFD-PH1000 | 35.0                            | 14.0                          | 2.71                                 | 56.25                                | 58.96                              |
